# Supplementary material for: Glycemic Control and Metabolic Adaptation in Response to High-Fat versus High-Carbohydrate Diets—Data from a Randomized Cross-Over Study in Healthy Subjects
Source: MDPI journal article supplement (doi:10.3390/nu13103322), 2021-09-23
Supplement: s1 [file s1]

**Supplementary Figure S1.** CONSORT diagram for inclusion of study participants.

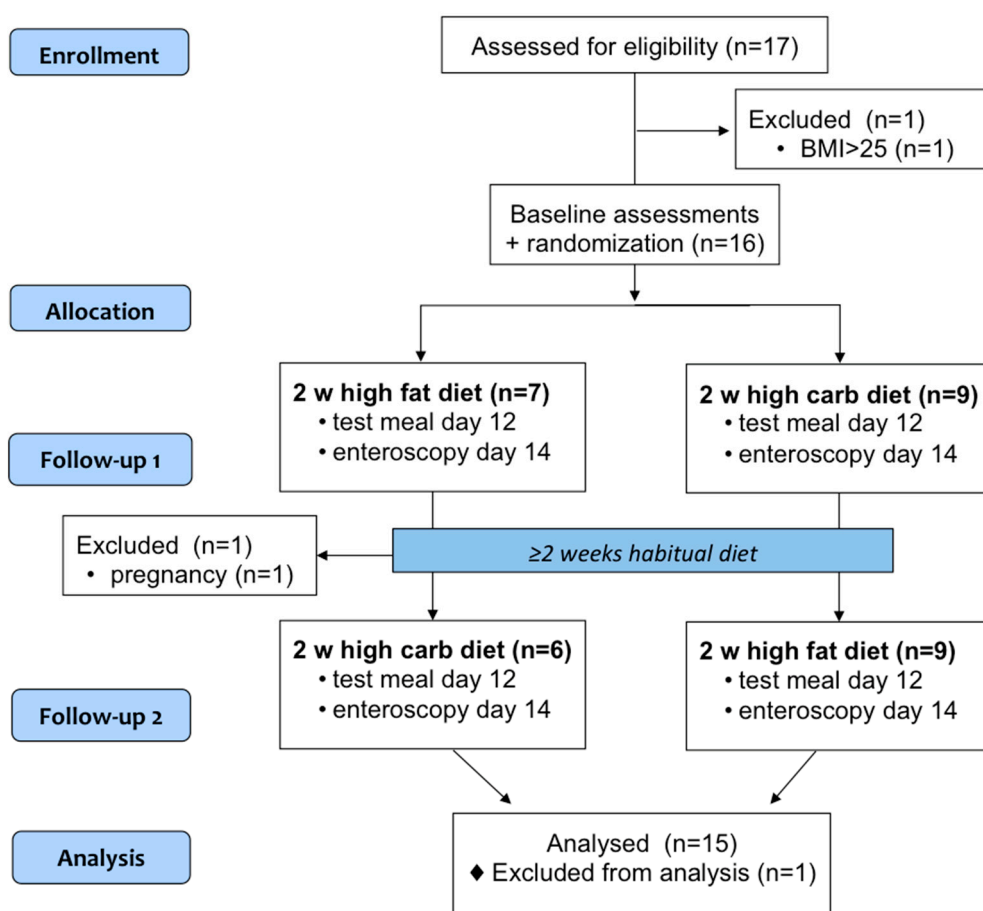

**Supplementary Figure S2.** Self reported energy intake.

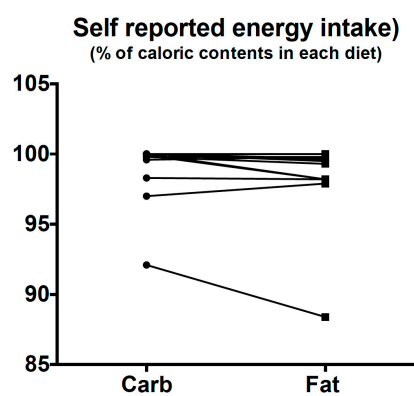

Supplementary Figure S3. Levels of additional metabolites during MMT after HFD and HCD.

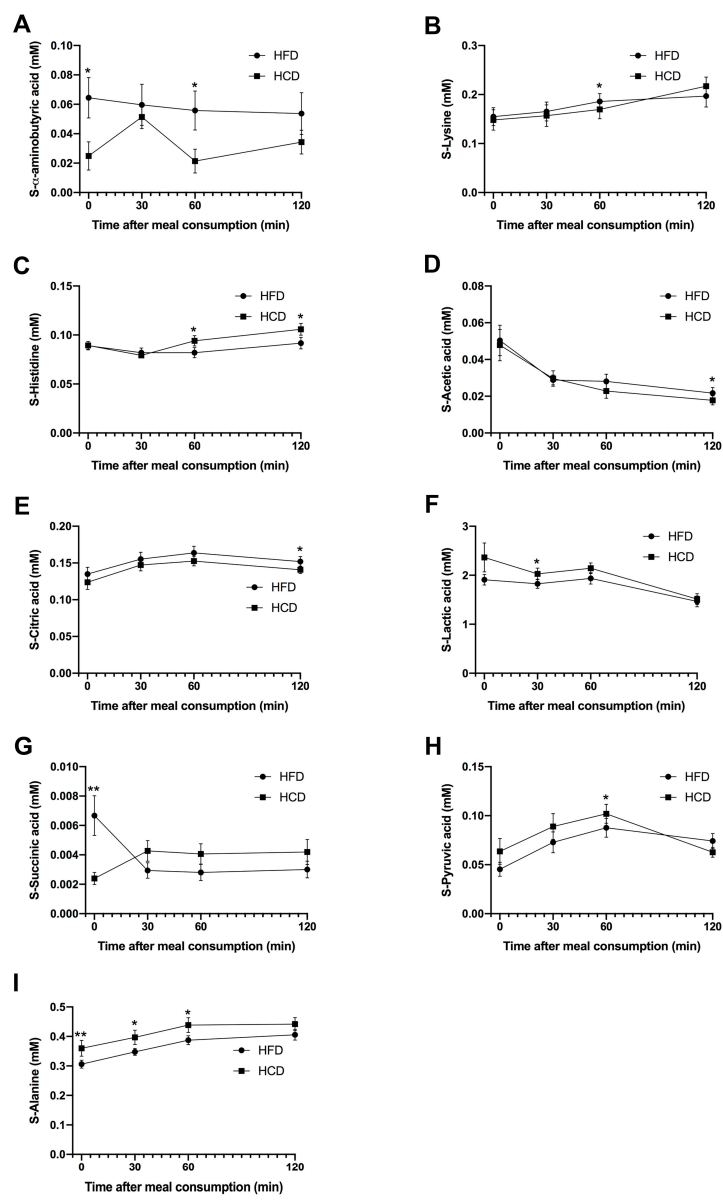

**Supplementary Table S1:** The dietary composition of the HFD and the HCD.

|                             | 2000 kcal/day |            | 2500 kcal/day |             | 3000 kcal/day |             |
|-----------------------------|---------------|------------|---------------|-------------|---------------|-------------|
|                             | HCD           | HFD        | HCD           | HFD         | HCD           | HFD         |
| Energy (kcal)               | 2034          | 2025       | 2514          | 2520        | 2996          | 3014        |
| Protein, g (E%)             | 100 (20)      | 97 (19)    | 127 (21)      | 118 (19)    | 152 (21)      | 139 (19)    |
| Fat, g (E%)                 | 46 (20)       | 137 (60)   | 57 (20)       | 172 (60)    | 67 (20)       | 207 (60)    |
| Carbohydrate, g (E%)        | 299 (60)      | 107 (21)   | 365 (59)      | 131 (21)    | 437 (59)      | 207 (21)    |
| Total fiber, g (E%)         | 13(1,28)      | 5,6(0,006) | 17,1(1,36)    | 8,1(0,006)  | 18,7(1,25)    | 9,4(0,006)  |
| Sucrose, g (E%)             | 21,9(4,3)     | 7,3(1,4)   | 31,5(5,0)     | 10,2(1,6)   | 33,8(4,5)     | 14,9(2,0)   |
| Saturated fat, g (E%)       | 5,8 (2,5)     | 37 (16)    | 9,2 (3,2)     | 47,4 (16,6) | 9,7 (2,8)     | 57,6 (16,9) |
| Monounsaturated fat, g (E%) | 6,5 (2,8)     | 22,5 (9,7) | 8,6 (3)       | 32,9 (11,5) | 9,8 (2,9)     | 40,6 (11,9) |
| Polyunsaturated fat, g (E%) | 3 (1,3)       | 7,1 (3,1)  | 3,4 (1,2)     | 11,2 (3,9)  | 4 (1,2)       | 14,2 (4,1)  |
| Sodium (mg)*                | 4318          | 3667       | 5129          | 4331        | 5928          | 4732        |

\*Sodium include sodium from industrial cooked meals and most other foods in the menu but excluding salt added to cooked meals in the laboratory kitchen

**Supplementary Table S2:** Examples of daily menus of the HCD and HFD.

| <b>HIGH CARBOHYDRATE DIET DAY</b>         | <b>2000 kcal</b> | <b>2500 kcal</b> | <b>3000 kcal</b> |
|-------------------------------------------|------------------|------------------|------------------|
| <b>Breakfast</b>                          |                  |                  |                  |
| Wholemeal bread (Frökusar, Fazer, Sweden) | 80               | 80               | 80               |
| Smoked ham                                | 30               | 60               | 60               |
| Tomato                                    | 70               | 70               | 70               |
| Milk 1,5% fat 3 dl (Arla, Sweden)         |                  | 300              | 300              |
| <b>Snack</b>                              |                  |                  |                  |
| Banana                                    | 210              | 210              | 210              |
| Drinking yoghurt (Arla, Sweden)           |                  |                  | 350              |
| <b>Lunch</b>                              |                  |                  |                  |
| Chicken thai (Dafgård, Sweden)            | 480              | 480              | 480              |
| <b>Snack</b>                              |                  |                  |                  |
| Apple                                     | 125              | 125              | 250              |
| Drinking yoghurt (Arla, Sweden)           |                  | 350              | 350              |
| <b>Dinner</b>                             |                  |                  |                  |
| Goulash soup:                             |                  |                  |                  |
| beef loin                                 | 100              | 100              | 100              |
| onion                                     | 30               | 30               | 30               |
| red pepper                                | 30               | 30               | 30               |
| garlic                                    | 2                | 2                | 2                |
| tomato puree                              | 5                | 5                | 5                |
| meat broth                                | 250              | 250              | 250              |
| potato                                    | 150              | 150              | 150              |
| Wholemeal bread (Frökusar, Fazer, Sweden) |                  | 40               | 80               |
| Orange juice (Tropicana, Sweden)          | 330              | 330              | 330              |
| <b>Evening meal</b>                       |                  |                  |                  |
| Wholemeal bread (Frökusar, Fazer, Sweden) | 80               | 80               | 80               |
| Smoked ham                                | 30               | 60               | 60               |
| Tomato                                    | 70               |                  |                  |
| Blueberry soup (Ekströms, Sweden)         | 300              | 300              | 500              |

|                  |      |      |      |
|------------------|------|------|------|
| Energy (kcal)    | 1969 | 2530 | 2966 |
| E% protein       | 18   | 20   | 20   |
| E% fat           | 20   | 19   | 18   |
| E% carbohydrates | 60   | 61   | 62   |

#### **HIGH FAT DIET DAY**

##### **Breakfast**

|             |    |    |     |
|-------------|----|----|-----|
| Fried egg   | 60 | 60 | 120 |
| Fried bacon | 50 | 50 | 90  |

##### **Lunch**

|                              |     |     |     |
|------------------------------|-----|-----|-----|
| Veal steak (Dafgård, Sweden) | 480 | 480 | 480 |
|------------------------------|-----|-----|-----|

##### **Dinner**

Jerusalem artichoke soup:

|                                             |      |      |     |
|---------------------------------------------|------|------|-----|
| jerusalem artichokes                        | 40   | 40   | 40  |
| potato                                      | 20   | 20   | 20  |
| onion                                       | 20   | 20   | 20  |
| chicken broth                               | 100  | 100  | 100 |
| cream 40% fat (Arla, Sweden)                | 60   | 60   | 60  |
| Parmesan cheese (cooked as chips)           | 20   | 20   | 20  |
| Fried pork fillet                           | 100  | 100  | 125 |
| Boiled rice (Uncle Ben's, )                 | 87,5 | 87,5 | 175 |
| Sauce with a taste of tarragon and mustard: | 50   | 75   | 75  |
| cream 40% fat (Arla Ltd)                    | 47   | 70   | 70  |
| french mustard                              | 3    | 5    | 5   |
| Boiled sugar peas                           | 100  | 100  | 100 |
| Fruit yogurt 5 % fat (Arla Ltd)             |      | 125  |     |

##### **Evening meal**

|            |    |    |     |
|------------|----|----|-----|
| Peanuts    |    | 60 | 100 |
| Foam candy | 20 | 20 | 20  |

|                  |      |      |      |
|------------------|------|------|------|
| Energy (kcal)    | 2011 | 2516 | 2996 |
| E% protein       | 20   | 19   | 21   |
| E% fat           | 59   | 60   | 60   |
| E% carbohydrates | 21   | 21   | 19   |

**Supplementary Table S3:** Composition of mixed mini-meal test (MMT).

|                             |             |
|-----------------------------|-------------|
| Energy (kcal)               | 603         |
| Protein, g (E%)             | 22,7 (15)   |
| Fat, g (E%)                 | 36,9 (54)   |
| Carbohydrate, g (E%)        | 45,8 (31)   |
| Total fiber, g (E%)         | 1,1 (0,004) |
| Sucrose, g (E%)             | 5,6 (4,7)   |
| Saturated fat, g (E%)       | 6,4 (9,4)   |
| Monounsaterated fat, g (E%) | 6,5 (9,6)   |
| Polyunsaturated fat, g (E%) | 2,1 (3)     |
| Sodium (mg)*                | 412         |

\*Sodium include sodium from industrial cooked meals  
and most other foods in the menu but excluding salt  
added to cooked meals in the laboratory kitchen
